# Supplementary material
Source: publisher figshare collection journal article supplement (https://acs.figshare.com/ndownloader/files/22780346)
Supplement: Supplementary file 1 [file 22780346]

**Supporting information for**

**Cu(I) Controls Conformational States in Human**

**Atox1 Metallochaperone: An EPR and**

**Multiscale Simulation Study**

*Ortal Perkal,<sup>‡,2</sup> Zena Qasem,<sup>‡,1</sup> Meital Turgeman,<sup>1</sup> Renana Schwartz,<sup>2</sup> Lada Gevorgyan-Airapetov,<sup>1</sup> Matic Pavlin,<sup>3</sup> Alessandra Magistrato,<sup>3</sup> Dan Thomas Major,<sup>\*,2</sup> Sharon Ruthstein<sup>\*,1</sup>*

<sup>1</sup>Department of Chemistry, Faculty of Exact Sciences, Bar Ilan University, Ramat-Gan 5290002, Israel.

<sup>2</sup>Department of Chemistry and Institute for Nanotechnology & Advanced Materials, Bar-Ilan University, Ramat-Gan 52900, Israel

<sup>3</sup>CNR-IOM at SISSA, via Bonomea 265, 34135, Trieste, Italy.

<sup>‡</sup>These authors contributed equally to the work

\*Corresponding authors: Dan T. Major: Tel. 972-3-5317684, Email: majort@biu.ac.il;

Sharon Ruthstein: Tel.: 973-3-7384329, Email: Sharon.ruthstein@biu.ac.il.

**Table S1.** Free energy profiles for proton transfer between Cys15 and Lys60.

|                              | $\Delta G^\ddagger$ | $\Delta G_r$ (kcal/mol) |
|------------------------------|---------------------|-------------------------|
| PMF-indirect proton transfer | 21.5                | 19.5                    |
| PMF-direct proton transfer   | 28.4                | 27.0                    |

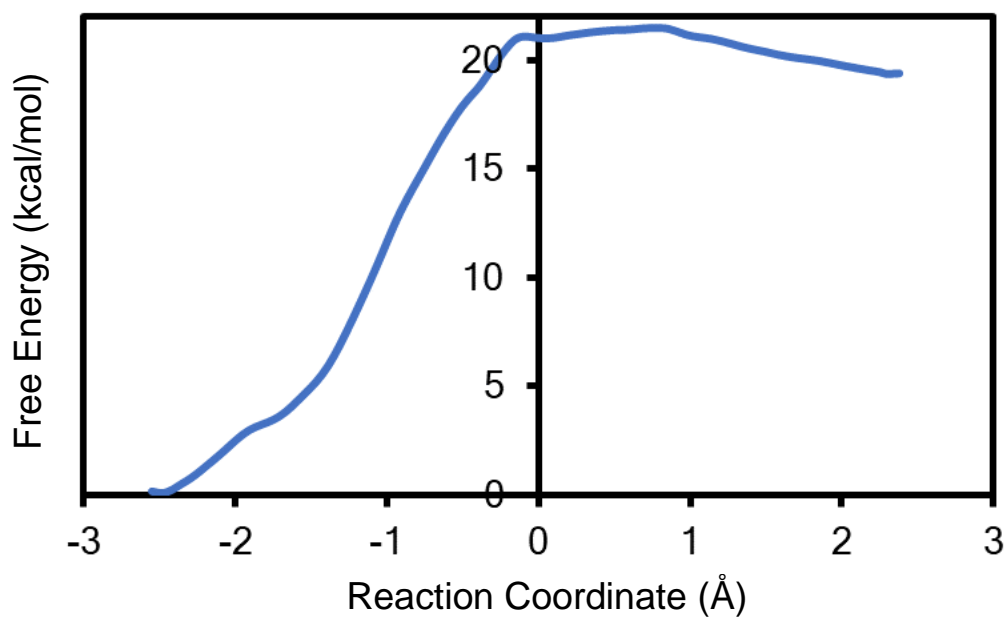

**Figure S1.** Free energy profiles for an indirect proton transfer between Lys60 and Cys15 via a bridging water molecule.

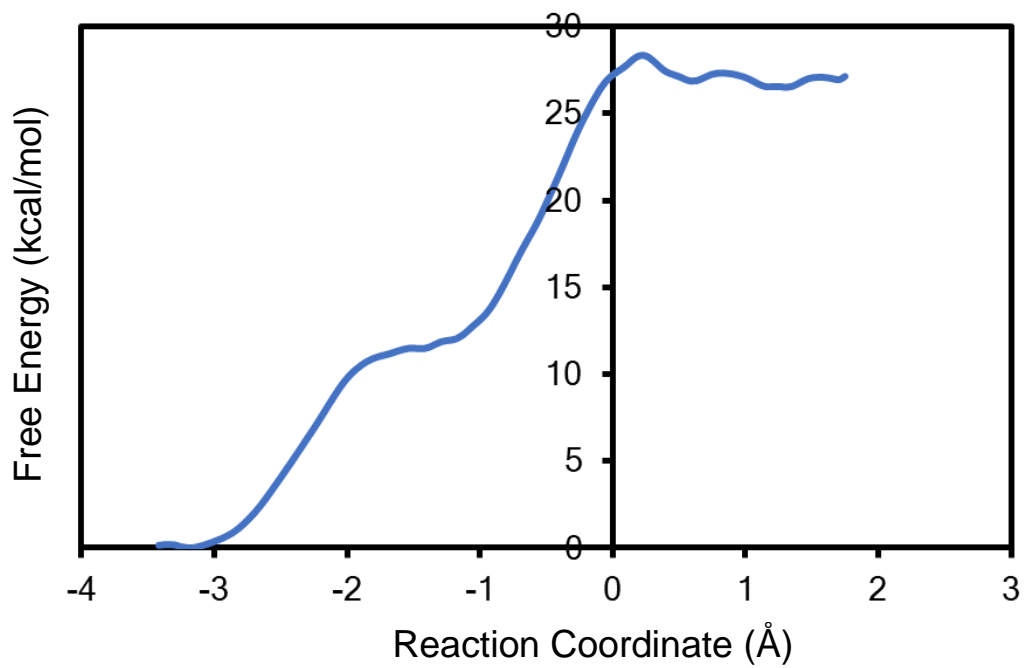

**Figure S2.** Free energy profile for a direct proton transfer between Lys60 and Cys15.

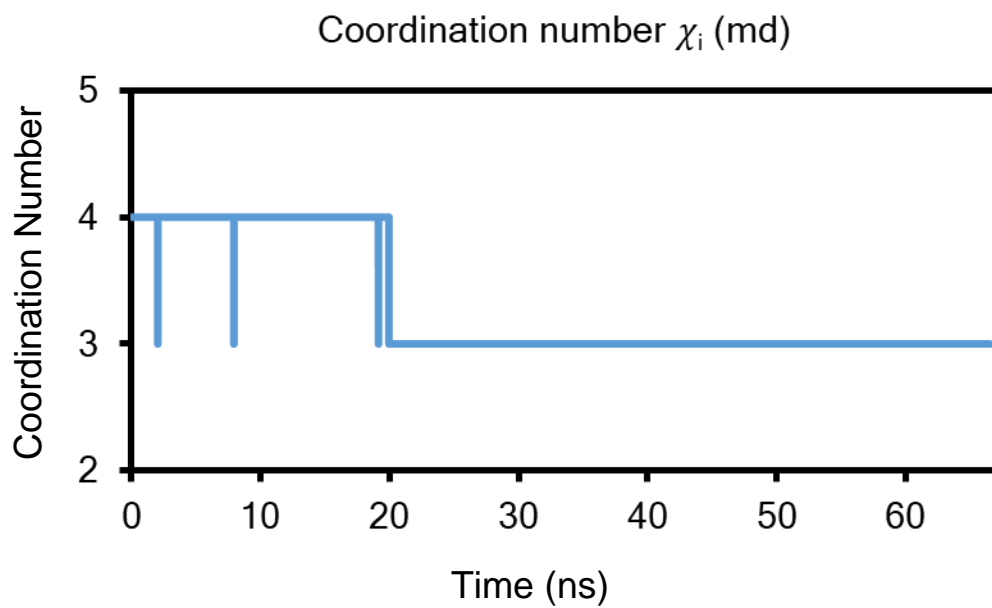

**Figure S3.** Atox1-Cu(I) coordination states during MD simulation (first replica).

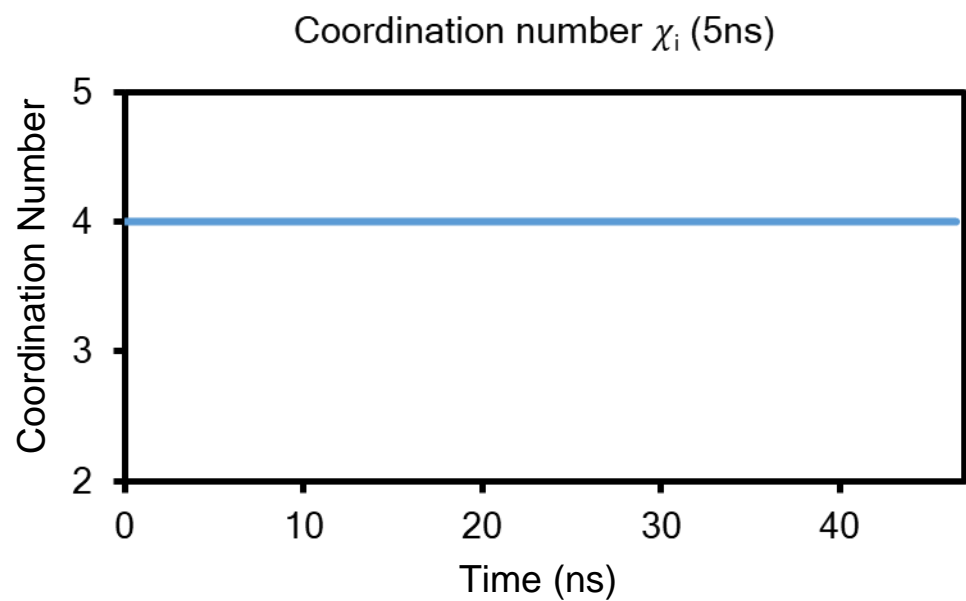

**Figure S4.** Atox1-Cu(I) coordination states during MD simulation (second replica).

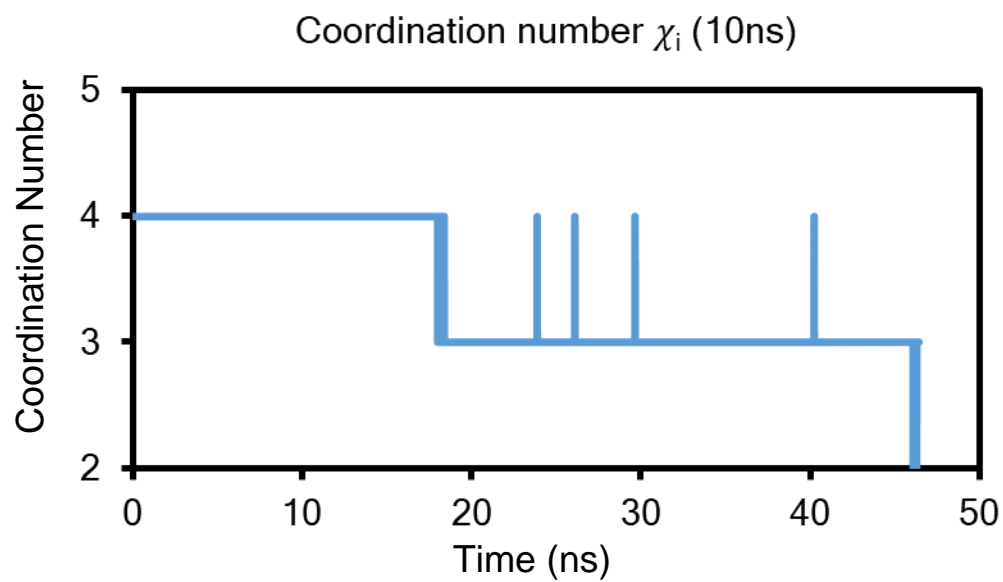

**Figure S5.** Atox1-Cu(I) coordination states during MD simulation (third replica).

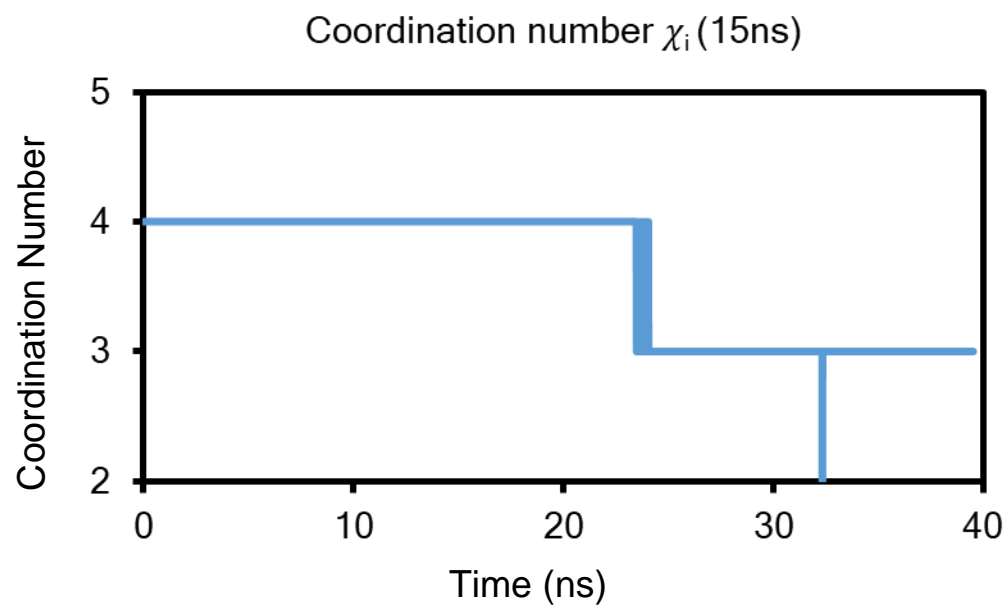

**Figure S6.** Atox1-Cu(I) coordination states during MD simulation (fourth replica).

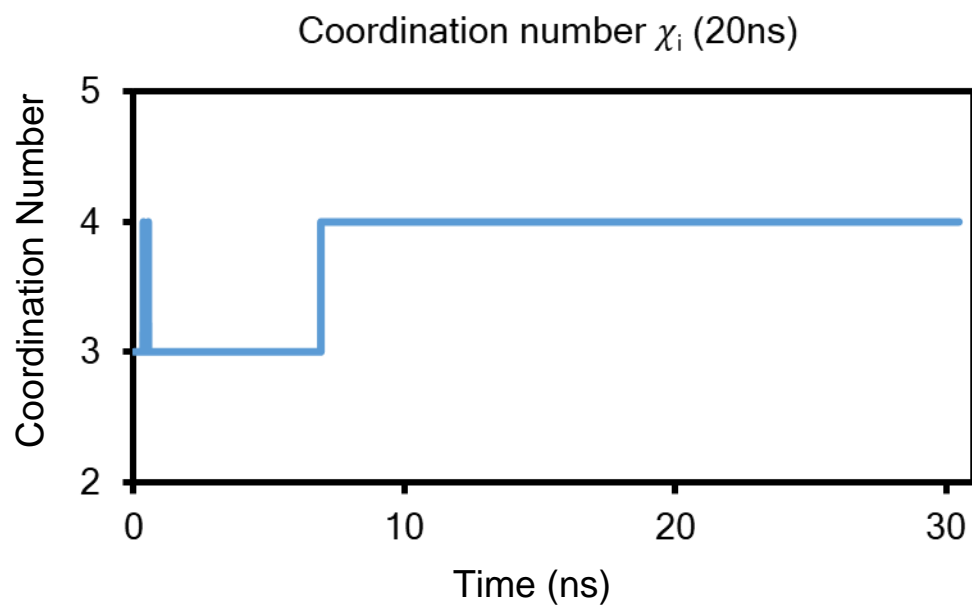

**Figure S7.** Atox1-Cu(I) coordination states during MD simulation (fifth replica).

Mathematical definition of coordination state in Atox1 ( $\chi_i$ ):

$$\chi_i = 4 - \sum_{i=1}^4 \delta_i \quad \delta_i = \begin{cases} 0 & \text{if } (r_i < 3.0) \\ 1 & \text{if } (r_i \geq 3.0) \end{cases}$$

**Table S2.** Total coordination abundance (based on five MD replicas).

| <b>Coordination #</b> | <b>Abundance (%)</b> |
|-----------------------|----------------------|
| 3                     | 42.5                 |
| 4                     | 57.5                 |

**Table S3.** Total coordination swaps (based on five MD replicas).

| <b>Coordination change</b> | <b>Occurrence</b> |
|----------------------------|-------------------|
| 3 to 4                     | 9                 |
| 4 to 3                     | 11                |
| 3 to 2                     | 2                 |
| 2 to 3                     | 2                 |

**Table S4.** Averaged distances (Å) for both coordination states (based on five MD replicas).<sup>a</sup>

|                     | <b>4</b>  | <b>3</b>  |
|---------------------|-----------|-----------|
| S(Cys12A)-Cu        | 2.17±0.08 | 2.12±0.07 |
| S(Cys15A)-Cu        | 2.2±0.1   | 3±1       |
| S(Cys12B)-Cu        | 2.16±0.08 | 2.13±0.08 |
| S(Cys15B)-Cu        | 2.2±0.1   | 2.6±0.8   |
| S(Cys15A)-N(Lys60A) | 5.1±0.3   | 5.3±0.8   |
| S(Cys15B)-N(Lys60B) | 5.2±0.4   | 4.9±0.7   |
| O(Thr11A)-S(Cys12B) | 4±1       | 4±1       |
| O(Thr11B)-S(Cys12A) | 4±1       | 5.2±0.9   |
| N(Lys60A)-O(Gly14B) | 5±1       | 8±1       |
| N(Lys60B)-O(Gly14A) | 5±1       | 8±1       |
| N(Lys60A)-O(Gly14A) | 5±1       | 7±1       |
| N(Lys60B)-O(Gly14B) | 5±1       | 6.2±0.5   |
| N(Lys60A)-N(Lys60B) | 3.8±0.4   | 3.8±0.4   |

<sup>a</sup> The MD trajectories were divided into two groups based on the main Cu coordination states, 3 and 4 using the definition appearing in conjunction with Table S2.

UV-Vis measurements were performed using a Carry 5000 spectrometer at room temperature. Measurements were carried out in a high-precision cell with a 10 mm optical path length. cell purchased from Hellma Analytics.

BCA (Bicinchoninic acid disodium salt hydrate; Sigma-Aldrich, St. Louis, MO, USA) was added to Atox1 samples and their UV-VIS spectra were recorded. The BCA concentration was 120  $\mu\text{M}$  to ensure the absence of free Cu(I) from the solution. Spectra were recorded from 200 to 800 nm with a step size and bandwidth of 0.5 nm. The spectra were baselined according to the absorption value at 800 nm, which is zero.

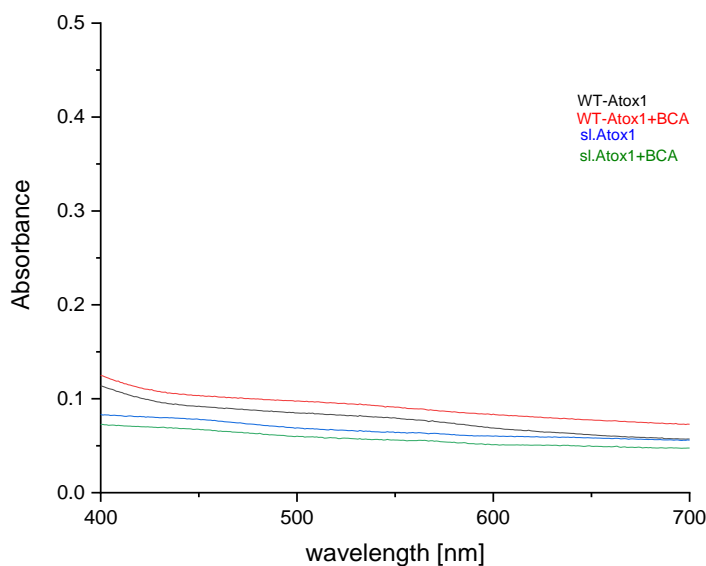

**Figure S8.** UV-Visible spectra of 60  $\mu\text{M}$  WT-Atox1 and 60  $\mu\text{M}$  spin-labeled (sl) Atox1 in the absence and in the presence of 120  $\mu\text{M}$  BCA reagent. The absorption peak at 562 nm, which corresponds to Cu(I)-BCA<sub>2</sub> complex was not observed in UV-Vis measurements. These results confirm the absence of Cu(I) in the protein samples.



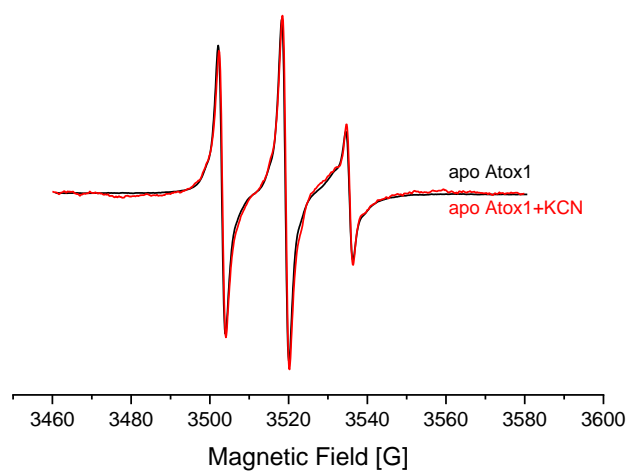

**Figure S9.** CW-EPR spectra of apo WT-Atox1 in the absence and presence of 0.1 mM KCN. The spectra are identical confirms no free Cu(I) ions after dialysis in the solution.
